# Supplementary material
Source: Royal Society of Chemistry journal article supplement (doi:10.1039/d6cy00153j)
Supplement: d6cy00153j1.pdf [file d6cy00153j1.pdf]

## Supporting Information

### **Modulating Hydrocarbon Coverage on Mo-Doped RuO<sub>2</sub> Anodes Enables Energy-Efficient and Selective Kolbe Electrolysis**

Jian Yang,<sup>a</sup> Fan Lin,<sup>a</sup> Shaojie Lei,<sup>a</sup> Zichen Li,<sup>a</sup> Hui Zhang,<sup>a</sup> Zhibao Huo<sup>a</sup> and Dezhang Ren<sup>\*a</sup>

<sup>a</sup> *College of Oceanography and Ecological Science, Shanghai Ocean University,  
No.999, Hucheng Ring Road, Shanghai, 201306, China*

\* Corresponding Author:

*E-mail:* [dzren@shou.edu.cn](mailto:dzren@shou.edu.cn)

## S1. Supporting Graphs

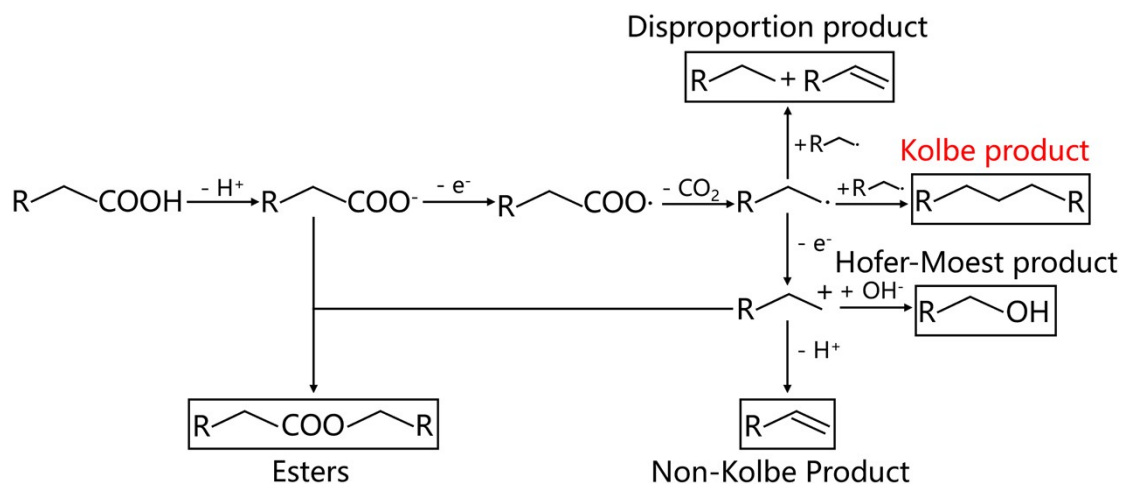

**Fig. S1.** Proposed reaction mechanism for the Kolbe electrolysis of carboxylic acids.

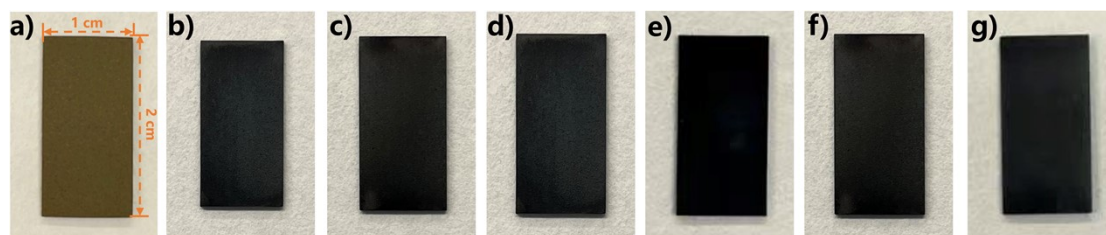

**Fig. S2.** Photographs of the Ti Substrate, the RuO<sub>2</sub> electrode, and the electrodes doped with different metals: (a) Ti Substrate after calcination at 470 °C, (b) RuO<sub>2</sub> electrode, (c) RuO<sub>2</sub>-5%Mo electrode, (d) RuO<sub>2</sub>-5%Ta electrode, (e) RuO<sub>2</sub>-5%Zr electrode, (f) RuO<sub>2</sub>-5%W electrode, (g) RuO<sub>2</sub>-5%Sn electrode.

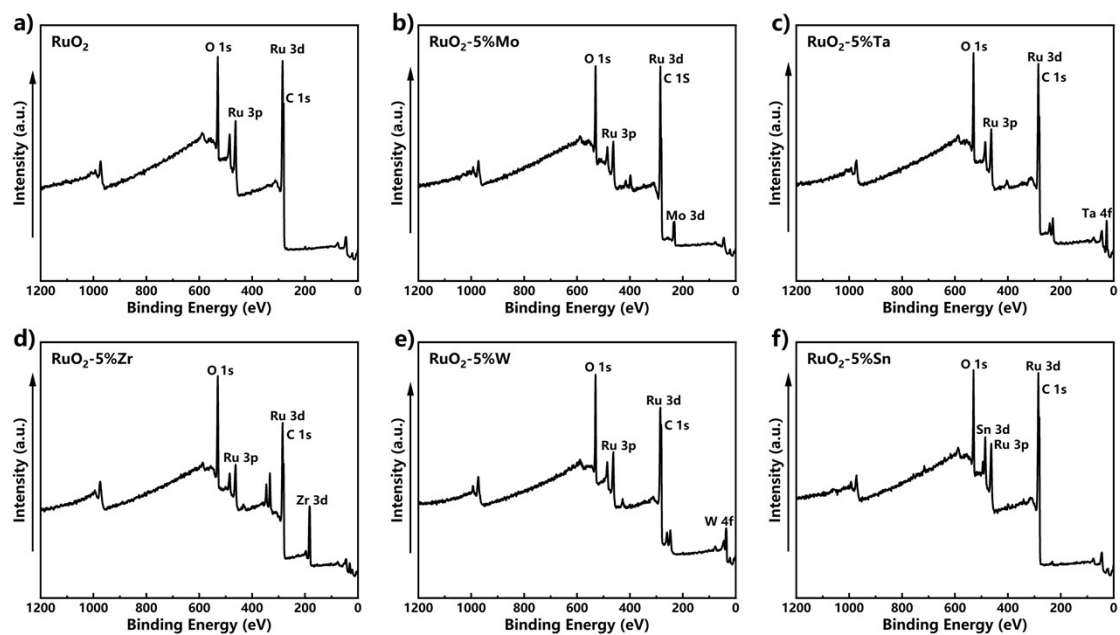

**Fig. S3.** XPS survey spectra of the  $\text{RuO}_2$  electrode and electrodes doped with different metals: (a)  $\text{RuO}_2$  electrode, (b)  $\text{RuO}_2$ -5%Mo electrode, (c)  $\text{RuO}_2$ -5%Ta electrode, (d)  $\text{RuO}_2$ -5%Zr electrode, (e)  $\text{RuO}_2$ -5%W electrode, (f)  $\text{RuO}_2$ -5%Sn electrode.

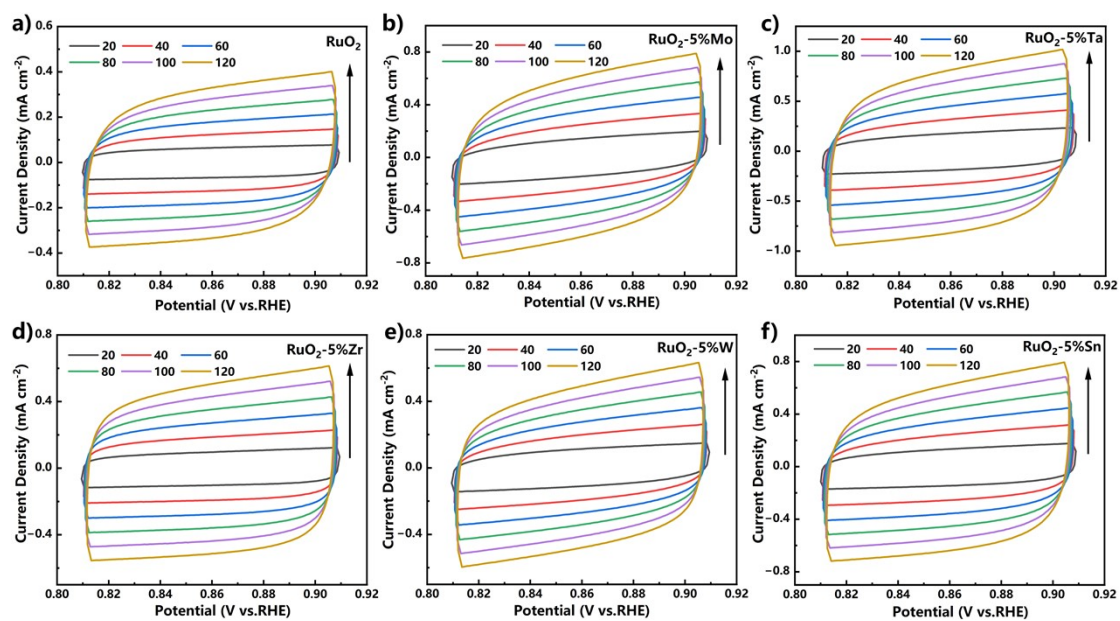

**Fig. S4.** CV curves of the RuO<sub>2</sub> and doped electrodes in 0.5 M KOH solution at different scan rates: (a) RuO<sub>2</sub>, (b) RuO<sub>2</sub>-5%Mo, (c) RuO<sub>2</sub>-5%Ta, (d) RuO<sub>2</sub>-5%Zr, (e) RuO<sub>2</sub>-5%W, (f) RuO<sub>2</sub>-5%Sn. All measurements were conducted using a three-electrode system with an Ag/AgCl reference electrode.

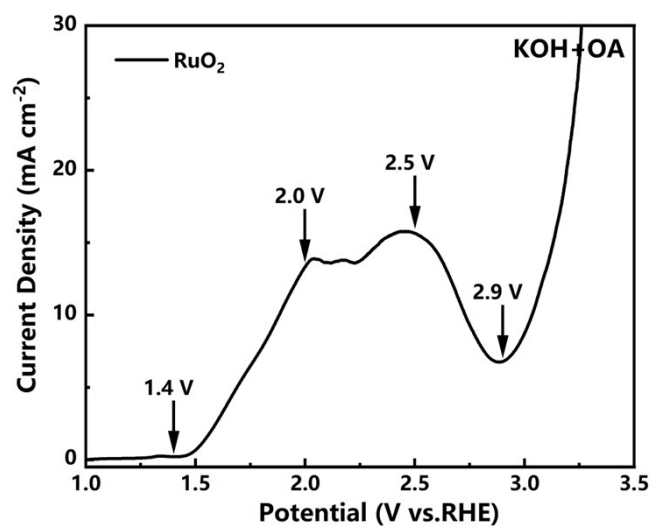

**Fig. S5.** LSV curve of the RuO<sub>2</sub> electrode in 0.5 M KOH + 0.5 M OA solution at a scan rate of 20 mV s<sup>-1</sup>.

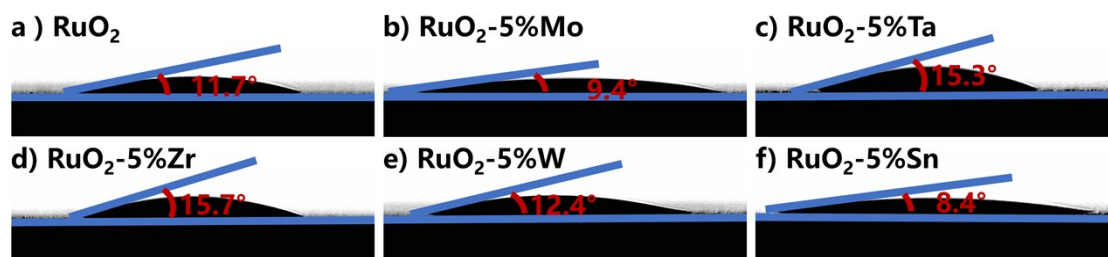

**Fig. S6.** Contact angle images of the fresh (as-prepared)  $\text{RuO}_2$  and doped electrodes: (a)  $\text{RuO}_2$ , (b)  $\text{RuO}_2$ -5%Mo, (c)  $\text{RuO}_2$ -5%Ta, (d)  $\text{RuO}_2$ -5%Zr, (e)  $\text{RuO}_2$ -5%W, (f)  $\text{RuO}_2$ -5%Sn.

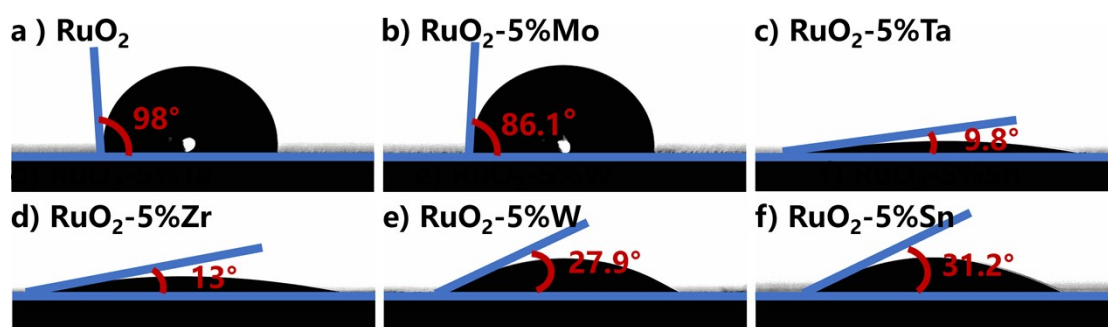

**Fig. S7.** Contact angle images of the  $\text{RuO}_2$  and doped electrodes after the LSV measurement: (a)  $\text{RuO}_2$ , (b)  $\text{RuO}_2$ -5%Mo, (c)  $\text{RuO}_2$ -5%Ta, (d)  $\text{RuO}_2$ -5%Zr, (e)  $\text{RuO}_2$ -5%W, (f)  $\text{RuO}_2$ -5%Sn.

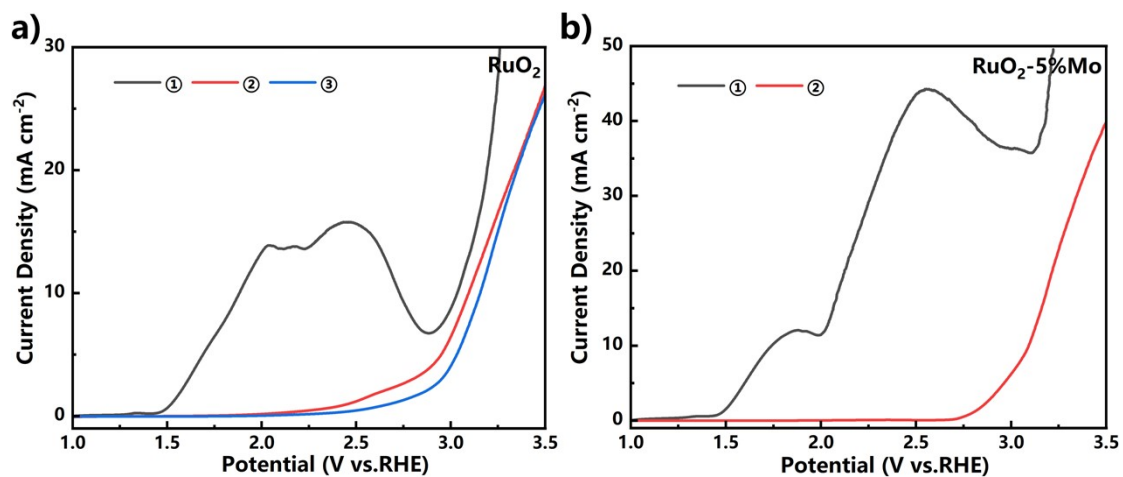

**Fig. S8.** Consecutive LSV scans of RuO<sub>2</sub> electrode and RuO<sub>2</sub>-5%Mo electrode. (a) RuO<sub>2</sub> electrode, (b) RuO<sub>2</sub>-5%Mo electrode. Electrolyte: 0.5 M KOH + 0.5 M OA. Scan rate: 20 mV s<sup>-1</sup>. Note: The electrode surface was not rinsed between consecutive scans, which were performed directly in the same electrolyte.

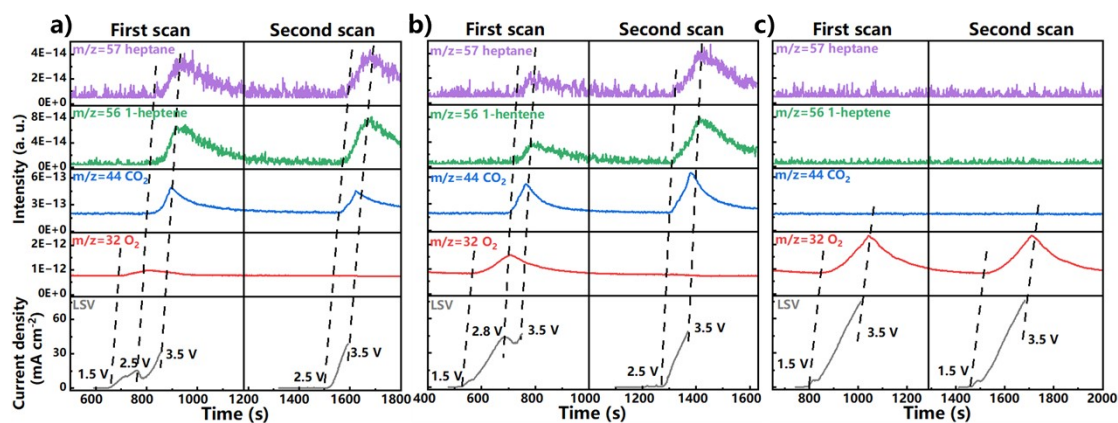

**Fig. S9.** DEMS results for the different electrodes: (a)  $\text{RuO}_2$ , (b)  $\text{RuO}_2$ -5%Mo, (c)  $\text{RuO}_2$ -5%Zr. The graphs display two consecutive LSV scans along with the corresponding signals of volatile products. Note: tetradecane ( $\text{C}_{14}$ ), the dimer product of Kolbe electrolysis, is not detectable by DEMS due to its extremely low vapor pressure at room temperature. The lag of the MS signal is caused by the time required for the transfer of gases from the electrode surface to the mass spectrometer detector.

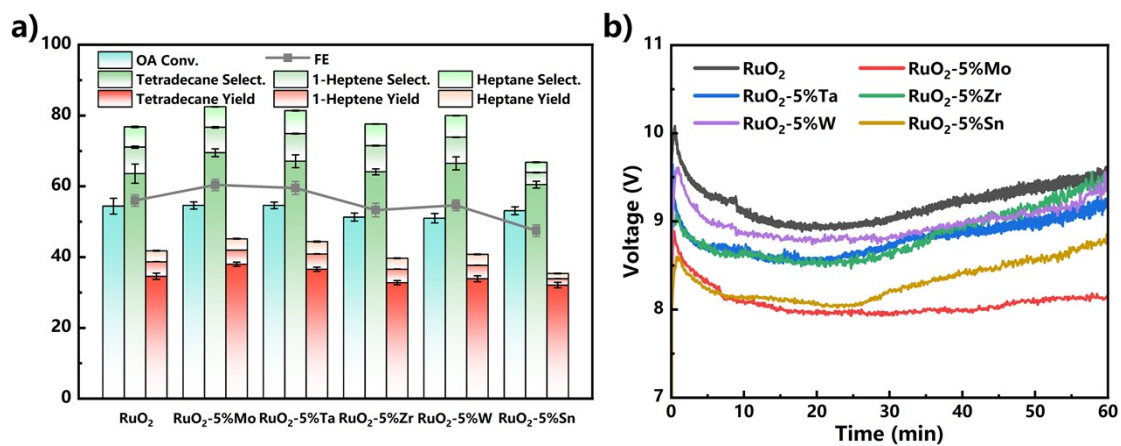

**Fig. S10.** Electrochemical performance of the RuO<sub>2</sub> and doped electrodes during galvanostatic electrolysis: (a) OA conversion, selectivity, yield of heptane, 1-heptene, tetradecane, and the overall Faradaic efficiency (FE), (b) cell voltage profile. The measurements were performed directly using a DC power supply in a two-electrode system; the voltages reported are the actual measured values.

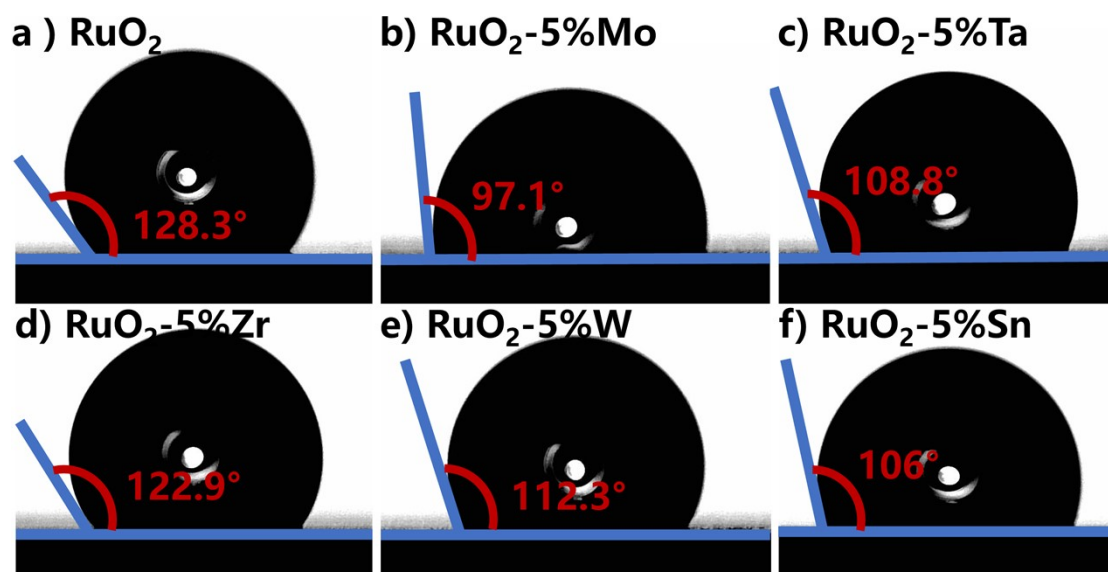

**Fig. S11.** Contact angle images of the  $\text{RuO}_2$  and doped electrodes after galvanostatic electrolysis: (a)  $\text{RuO}_2$ , (b)  $\text{RuO}_2$ -5%Mo, (c)  $\text{RuO}_2$ -5%Ta, (d)  $\text{RuO}_2$ -5%Zr, (e)  $\text{RuO}_2$ -5%W, (f)  $\text{RuO}_2$ -5%Sn.

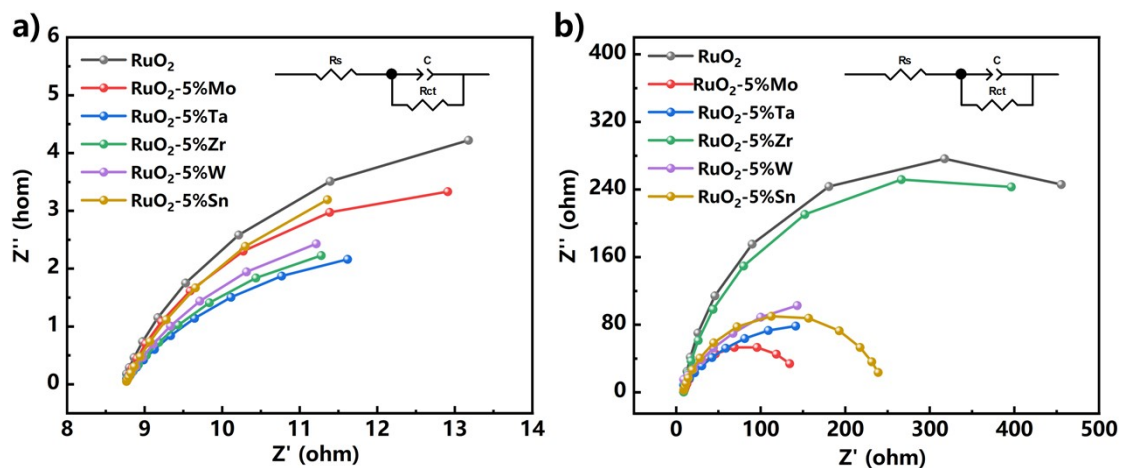

**Fig. S12.** Nyquist plots of the RuO<sub>2</sub> and metal-doped electrodes recorded after the passage of the same charge quantity, comparing the electrodes before and after 60 min of galvanostatic electrolysis. (a) before electrolysis, (b) after 60 min of galvanostatic electrolysis. Electrolyte: 0.5 M KOH + 0.5 M OA. The comparison illustrates the evolution of the surface coverage and its influence on the electrode's charge transfer resistance during extended operation.

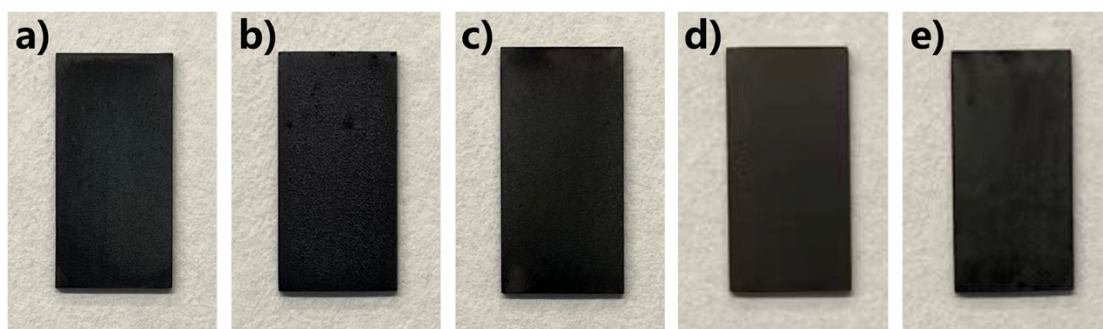

**Fig. S13.** Photographs of the RuO<sub>2</sub> electrodes with different Mo doping levels: (a) RuO<sub>2</sub>, (b) RuO<sub>2</sub>-1%Mo, (c) RuO<sub>2</sub>-5%Mo, (d) RuO<sub>2</sub>-10%Mo, (e) RuO<sub>2</sub>-20%Mo.

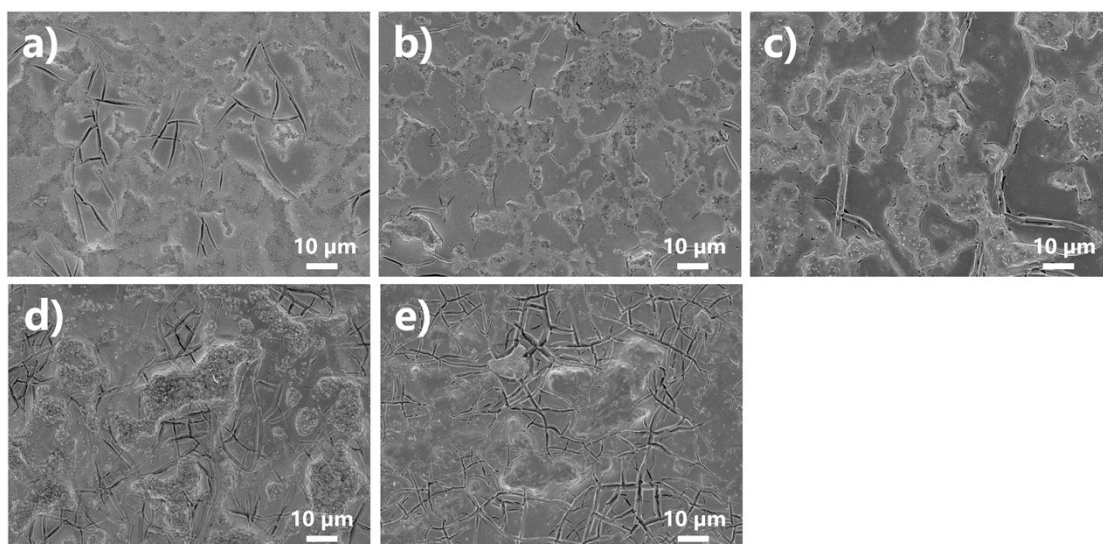

**Fig. S14.** Low-magnification SEM images of the RuO<sub>2</sub> electrodes with different Mo doping levels: (a) RuO<sub>2</sub>, (b) RuO<sub>2</sub>-1%Mo, (c) RuO<sub>2</sub>-5%Mo, (d) RuO<sub>2</sub>-10%Mo, (e) RuO<sub>2</sub>-20%Mo. The scale bar is 10 μm.

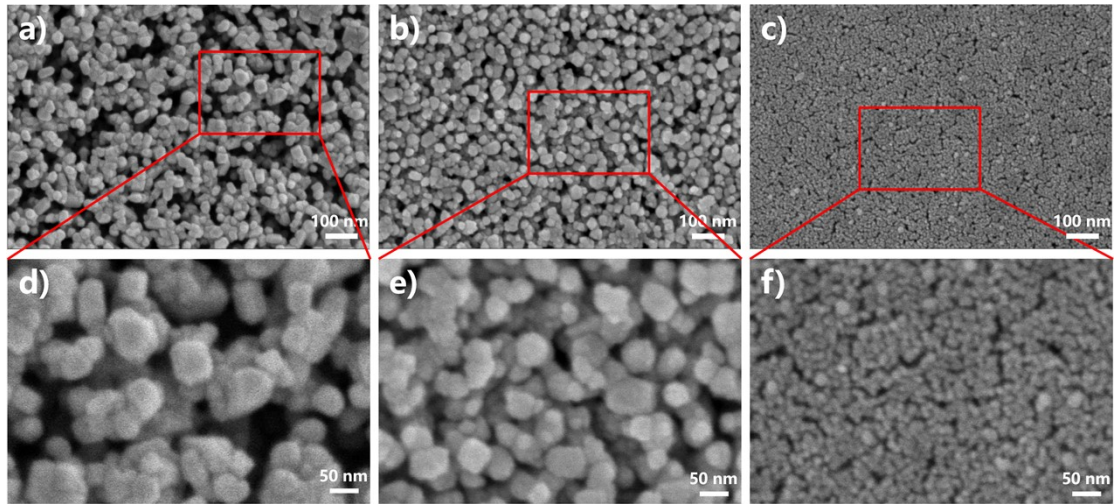

**Fig. S15.** High-magnification SEM images of the RuO<sub>2</sub> electrodes with different Mo doping levels: (a, d) RuO<sub>2</sub>, (b, e) RuO<sub>2</sub>-1%Mo, (c, f) RuO<sub>2</sub>-20%Mo. The scale bars in panels (a-c) and (d-f) are 100 nm and 50 nm, respectively.

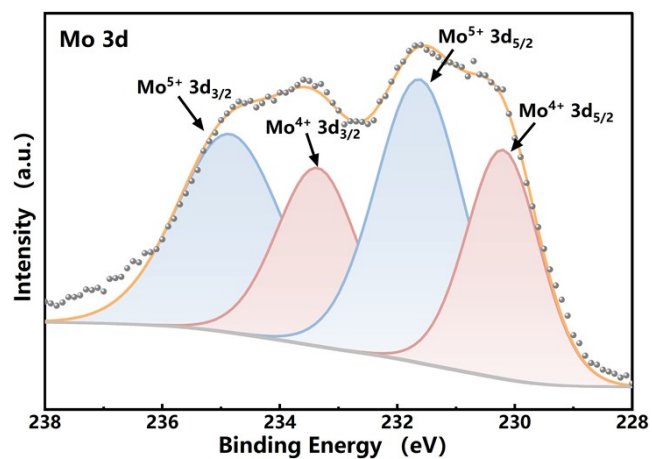

**Fig. S16.** High-resolution XPS spectrum of Mo 3d acquired from the RuO<sub>2</sub>-5%Mo electrode, showing the chemical states of Mo.

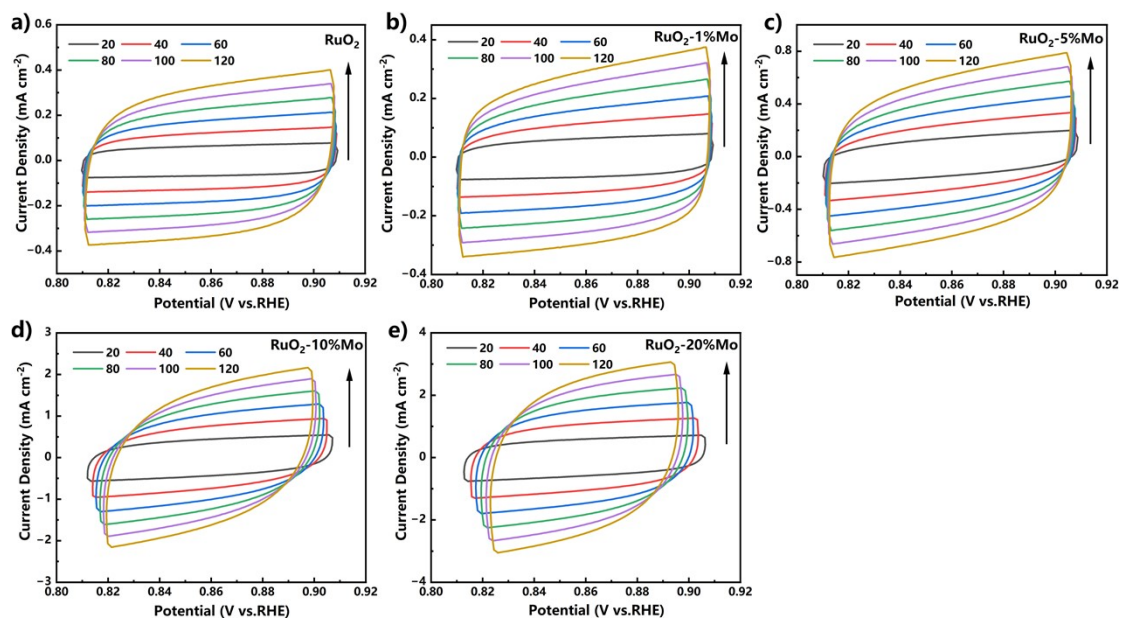

**Fig. S17.** CV curves of the RuO<sub>2</sub> electrodes with different Mo doping levels at various scan rates: (a) RuO<sub>2</sub>, (b) RuO<sub>2</sub>-1%Mo, (c) RuO<sub>2</sub>-5%Mo, (d) RuO<sub>2</sub>-10%Mo, (e) RuO<sub>2</sub>-20%Mo. The measurement conditions are the same as those described for Fig. S4.

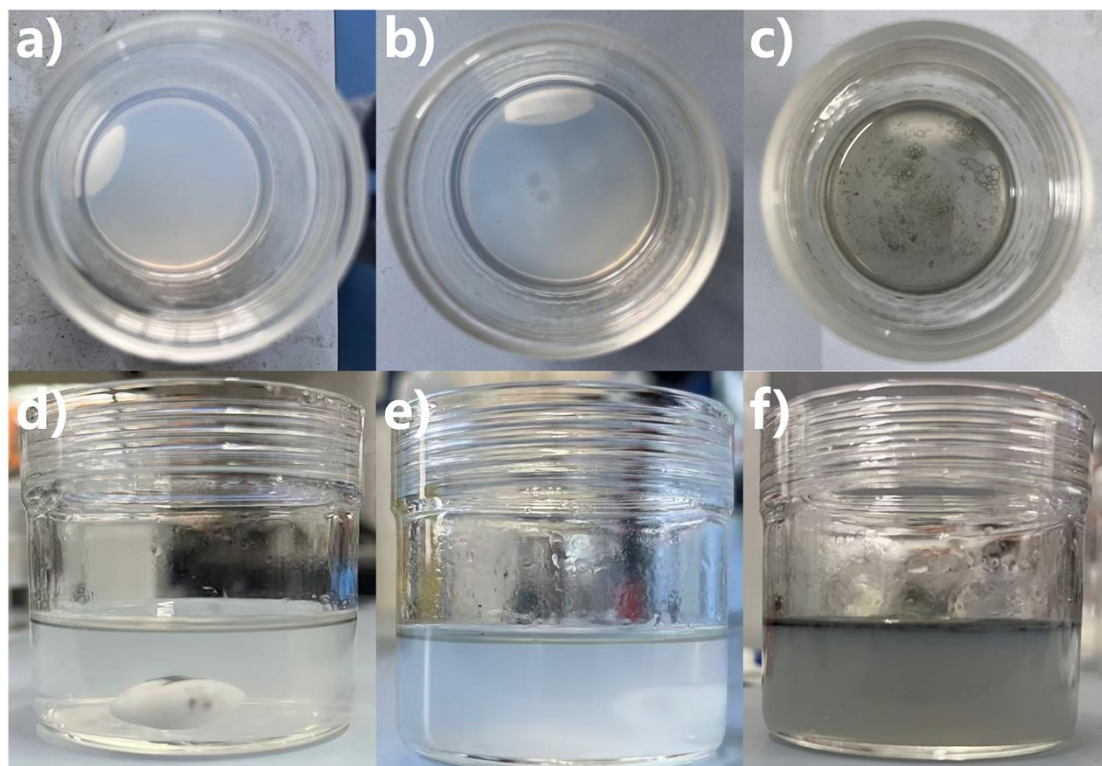

**Fig. S18.** Photographs of the electrolytes after galvanostatic electrolysis for the  $\text{RuO}_2$  electrodes with different Mo doping levels: (a, d)  $\text{RuO}_2$ , (b, e)  $\text{RuO}_2$ -5%Mo, (c, f)  $\text{RuO}_2$ -10%Mo.

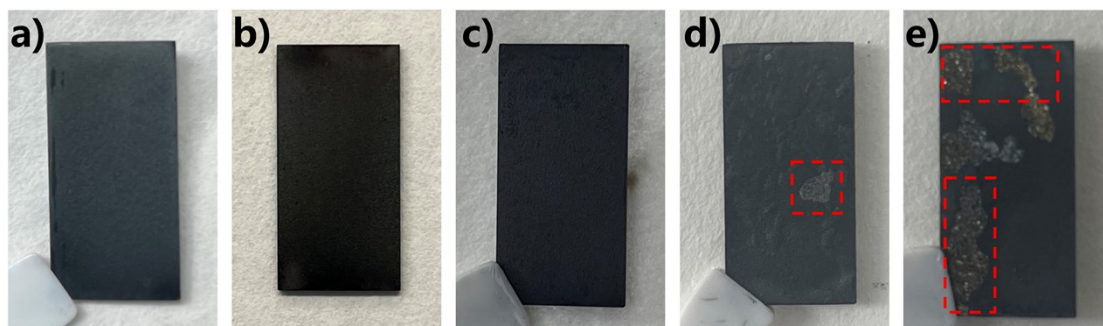

**Fig. S19.** Photographs of the  $\text{RuO}_2\text{-5\%Mo}$  electrodes prepared at different calcination temperatures: (a) 300 °C, (b) 470 °C, (c) 600 °C, (d) 650 °C, (e) 700 °C.

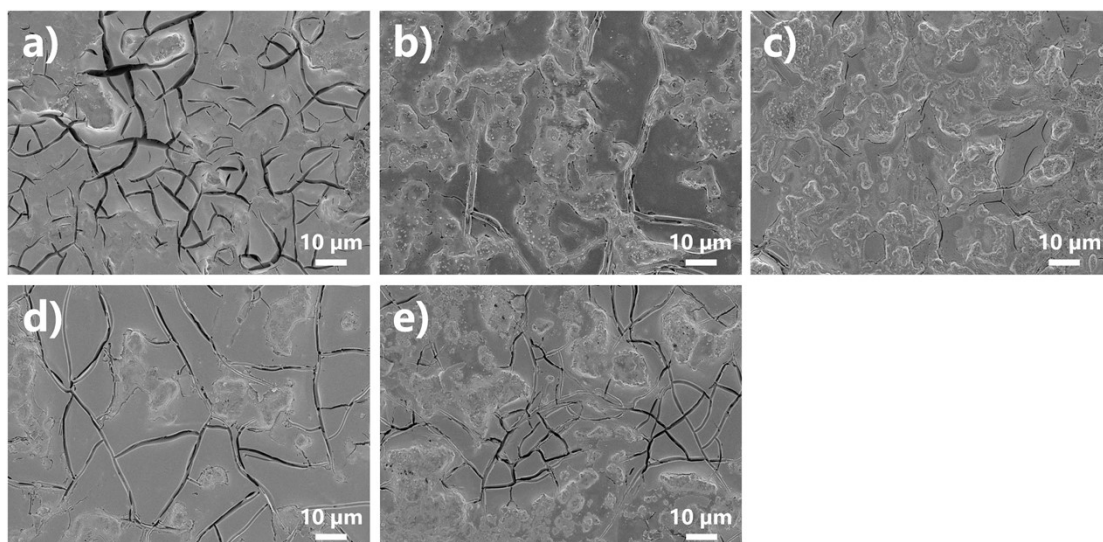

**Fig. S20.** Low-magnification SEM images of the RuO<sub>2</sub>-5%Mo electrodes prepared at different calcination temperatures: (a) 300 °C, (b) 470 °C, (c) 600 °C, (d) 650 °C, (e) 700 °C. The scale bar is 10 μm.

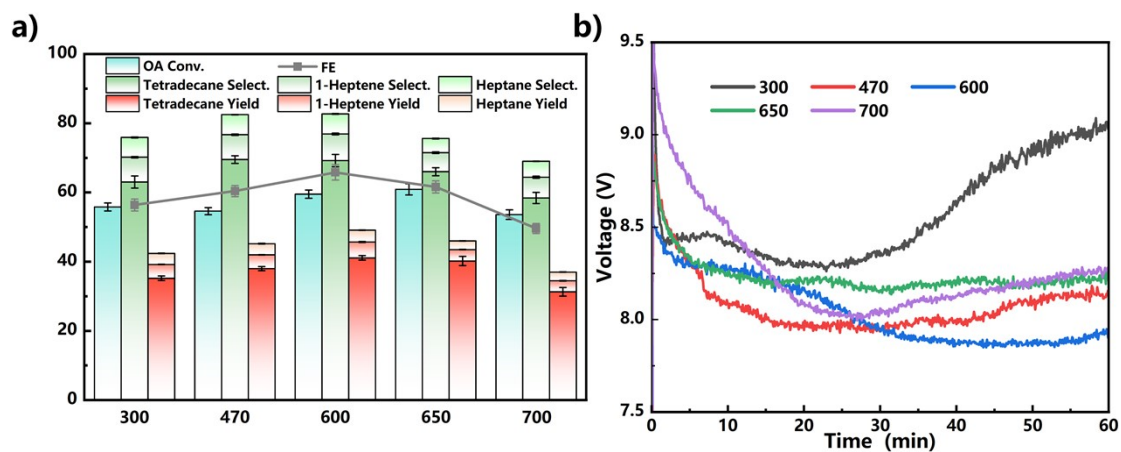

**Fig. S21.** Electrolysis performance of the RuO<sub>2</sub>-5%Mo electrodes prepared at different calcination temperatures: (a) OA conversion, selectivity, yield of heptane, 1-heptene, tetradecane, and the overall Faradaic efficiency (FE). (b) Cell voltage profiles during galvanostatic electrolysis. Note: The measurements were performed directly using a DC power supply in a two-electrode system; the voltages reported are the actual measured values.

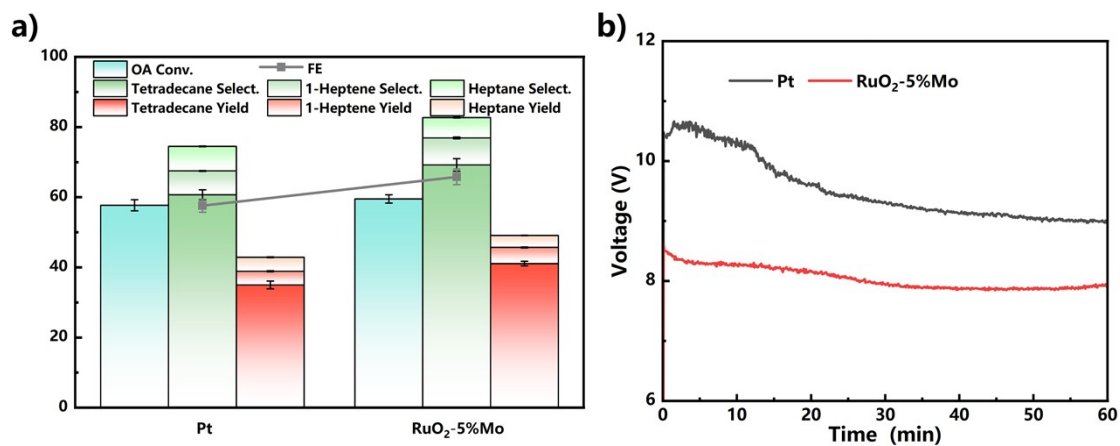

**Fig. S22.** Comparison of the electrolysis performance between the Pt electrode and the RuO<sub>2</sub>-5%Mo electrode under identical reaction conditions: (a) OA conversion, selectivity, yield of heptane, 1-heptene, tetradecane, and the overall Faradaic efficiency (FE). (b) Cell voltage profiles during galvanostatic electrolysis. Note: The measurements were performed directly using a DC power supply in a two-electrode system; the voltages reported are the actual measured values.

## S2. Supporting Tables

**Table S1.** Ionic radii and electronegativity of the different metallic elements.

| Element          | Ionic Radius (Å) | Electronegativity |
|------------------|------------------|-------------------|
| Ru <sup>4+</sup> | 0.62             | 2.2               |
| Mo <sup>6+</sup> | 0.59             | 2.16              |
| Ta <sup>5+</sup> | 0.64             | 1.5               |
| Zr <sup>4+</sup> | 0.72             | 1.33              |
| W <sup>6+</sup>  | 0.6              | 2.36              |
| Sn <sup>4+</sup> | 0.69             | 1.96              |

**Table S2.** Mass and thickness changes of the Ti Substrate, RuO<sub>2</sub> electrode, and doped electrodes before and after calcination.

|                        | Mass before<br>Coating (g) | Mass after<br>Coating (g) | Mass increase<br>(g) |
|------------------------|----------------------------|---------------------------|----------------------|
| Ti Substrate           | 0.846                      | 0.846                     | 0                    |
| RuO <sub>2</sub>       | 0.852                      | 0.864                     | 0.012±0.002          |
| RuO <sub>2</sub> -5%Mo | 0.843                      | 0.856                     | 0.013±0.002          |
| RuO <sub>2</sub> -5%Ta | 0.844                      | 0.854                     | 0.010±0.001          |
| RuO <sub>2</sub> -5%Zr | 0.845                      | 0.857                     | 0.012±0.002          |
| RuO <sub>2</sub> -5%W  | 0.842                      | 0.851                     | 0.009±0.002          |
| RuO <sub>2</sub> -5%Sn | 0.851                      | 0.864                     | 0.013±0.002          |

**Table S3.** Summary of structural and surface electronic properties: XRD parameters ( $2\theta$  position and FWHM of the RuO<sub>2</sub> (110) plane, crystallite size) and XPS binding energy of Ru 3p<sub>3/2</sub> for the RuO<sub>2</sub> and doped electrodes.

|                        | XRD (RuO <sub>2</sub> 110) |          |        | XPS (Ru 3p <sub>3/2</sub> ) |
|------------------------|----------------------------|----------|--------|-----------------------------|
|                        | $2\theta$ (°)              | FWHM (°) | D (nm) | Binding Energy (eV)         |
| RuO <sub>2</sub>       | 27.9                       | 0.55     | 14.8   | 462.74                      |
| RuO <sub>2</sub> -5%Mo | 27.8                       | 0.55     | 14.6   | 462.53                      |
| RuO <sub>2</sub> -5%Ta | 27.9                       | 0.55     | 14.6   | 462.44                      |
| RuO <sub>2</sub> -5%Zr | 27.8                       | 0.51     | 15.9   | 462.15                      |
| RuO <sub>2</sub> -5%W  | 27.9                       | 0.57     | 14.2   | 462.79                      |
| RuO <sub>2</sub> -5%Sn | 27.9                       | 0.53     | 15.2   | 462.49                      |

**Table S4.** Electrochemical performance parameters of the RuO<sub>2</sub> and doped electrodes.

|                        | Onset<br>Potential<br>for OER (V<br>vs. RHE) | Potential at<br>10 mA cm <sup>-2</sup> (V vs.<br>RHE) | Tafel Slope<br>(mV dec <sup>-1</sup> ) | C <sub>dl</sub> (mF cm <sup>-2</sup> ) | ECSA<br>(cm <sup>2</sup> geo) |
|------------------------|----------------------------------------------|-------------------------------------------------------|----------------------------------------|----------------------------------------|-------------------------------|
| RuO <sub>2</sub>       | 1.41                                         | 1.59                                                  | 94.4                                   | 1.88                                   | 47                            |
| RuO <sub>2</sub> -5%Mo | 1.4                                          | 1.53                                                  | 72.6                                   | 4.53                                   | 113.3                         |
| RuO <sub>2</sub> -5%Ta | 1.41                                         | 1.55                                                  | 84.1                                   | 6.13                                   | 153.3                         |
| RuO <sub>2</sub> -5%Zr | 1.41                                         | 1.54                                                  | 68.3                                   | 4.04                                   | 101                           |
| RuO <sub>2</sub> -5%W  | 1.41                                         | 1.56                                                  | 91.5                                   | 3.64                                   | 91                            |
| RuO <sub>2</sub> -5%Sn | 1.41                                         | 1.54                                                  | 78.4                                   | 4.8                                    | 120                           |

**Table S5.** Instantaneous current densities of the RuO<sub>2</sub> and doped electrodes at different times during potentiostatic electrolysis.

|                        | 10 min (mA cm <sup>-2</sup> ) | 30 min (mA cm <sup>-2</sup> ) | 60 min (mA cm <sup>-2</sup> ) |
|------------------------|-------------------------------|-------------------------------|-------------------------------|
| RuO <sub>2</sub>       | 21.3                          | 23.8                          | 23.8                          |
| RuO <sub>2</sub> -5%Mo | 30                            | 30.1                          | 30                            |
| RuO <sub>2</sub> -5%Ta | 57                            | 36.4                          | 29.6                          |
| RuO <sub>2</sub> -5%Zr | 47.4                          | 39.7                          | 24.8                          |
| RuO <sub>2</sub> -5%W  | 32.5                          | 34.7                          | 34.8                          |
| RuO <sub>2</sub> -5%Sn | 39.7                          | 37.1                          | 34.8                          |

**Table S6.** Charge transfer resistance ( $R_{ct}$ ) of the RuO<sub>2</sub> and doped electrodes before and after electrolysis.

|                        | fresh ( $\Omega$ ) | after 60 min electrolysis ( $\Omega$ ) |
|------------------------|--------------------|----------------------------------------|
| RuO <sub>2</sub>       | 11.5               | 623.5                                  |
| RuO <sub>2</sub> -5%Mo | 8.9                | 147                                    |
| RuO <sub>2</sub> -5%Ta | 7.9                | 305.2                                  |
| RuO <sub>2</sub> -5%Zr | 7.9                | 605.1                                  |
| RuO <sub>2</sub> -5%W  | 7.3                | 381                                    |
| RuO <sub>2</sub> -5%Sn | 11.5               | 240                                    |

**Table S7.** Assessment of Ru dissolution after electrolysis.

|                         | Concentration (mg/L) |
|-------------------------|----------------------|
| RuO <sub>2</sub>        | 1.0                  |
| RuO <sub>2</sub> -5%Mo  | 1.5                  |
| RuO <sub>2</sub> -10%Mo | 3.7                  |
